# Supplementary material for: Large-pore, silica particles with antibody-like, biorecognition sites for efficient protein separation
Source: Royal Society of Chemistry journal article supplement (doi:10.1039/c7tb00886d), 2017-01-01
Supplement: c7tb00886d1.pdf [file c7tb00886d1.pdf]

## Electronic Supplementary Information

### **Large-pore silica particles with antibody-like bio- recognition sites for efficient protein separation**

*Zulei Zhang<sup>a,b</sup>, Xingdi Zhang<sup>a</sup>, Dechao Niu<sup>a</sup>, Yongsheng Li<sup>a\*</sup> and Jianlin Shi<sup>a,c</sup>*

<sup>a</sup> Lab of Low-Dimensional Materials Chemistry, Key Laboratory for Ultrafine Materials of Ministry of Education, School of Materials Science and Engineering, East China University of Science and Technology, Shanghai 200237, China

<sup>b</sup> School of Biology and Chemical Engineering, Jiaxing University, Jiaxing 314001, China

<sup>c</sup> State Key Laboratory of High Performance Ceramics and Superfine Microstructure, Shanghai Institute of Ceramics, Chinese Academy of Sciences, Shanghai 200050, China

\*Corresponding author

Email: [ysli@ecust.edu.cn](mailto:ysli@ecust.edu.cn)

Fax: +86-21-64250740; Tel: +86-21-64250740

## 1. Equations

The pseudo-first-order rate equation is listed as follows:

$$\ln(Q_e - Q_t) = \ln Q_e - k_1 t \quad (1)$$

where  $Q_e$  and  $Q_t$  (mg/g) are the amount of BSA adsorbed on MI-LPSPs at equilibrium and time  $t$ , respectively.  $k_1$  (cm<sup>-1</sup>) is the rate constant of pseudo-first-order model.

The pseudo-second-order rate equation is listed as follows:

$$\frac{t}{Q_t} = \frac{1}{k_2 Q_e^2} + \left(\frac{1}{Q_e}\right)t \quad (2)$$

where  $k_2$  is the rate constant of pseudo-second-order model.

Langmuir adsorption equation has the linear form as following:

$$\frac{C_e}{q_e} = \frac{1}{k_L q_{\max}} + \frac{C_e}{q_{\max}} \quad (3)$$

where  $C_e$  is the equilibrium concentration of BSA (mg/mL);  $q_e$  denotes the adsorption capacity of MI-LPSPs at equilibrium (mg/g), and  $q_{\max}$  is the maximum adsorption capacity (mg/g).  $k_L$  is the Langmuir constant (L/g) that relates to adsorption energy and affinity of binding sites.

The linear mathematical expression of the Freundlich model is presented as:

$$\log q_e = \log k_F + (n) \log C_e \quad (4)$$

$k_F$  (g<sup>1-n</sup> L<sup>n</sup>/g) is Freundlich constant related to the adsorption capacity of the adsorbent, and  $n$  signifies adsorption intensity.

## 2. Supporting data

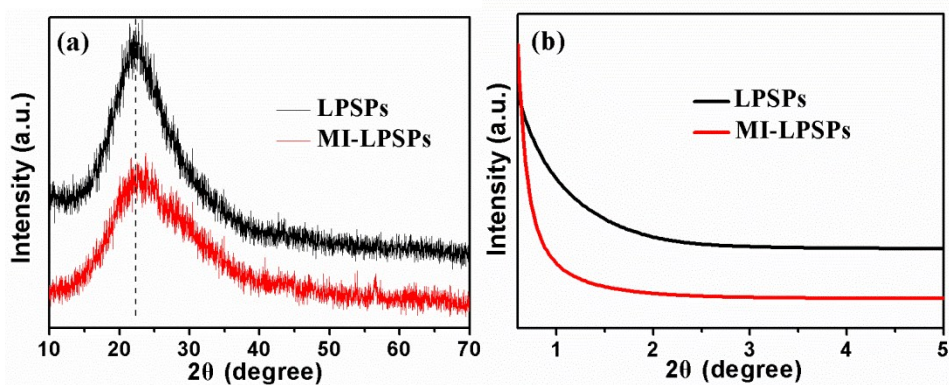

Fig. S1 Wide-angle (a) and low-angle (b) XRD spectra of LPSPs and MI-LPSPs

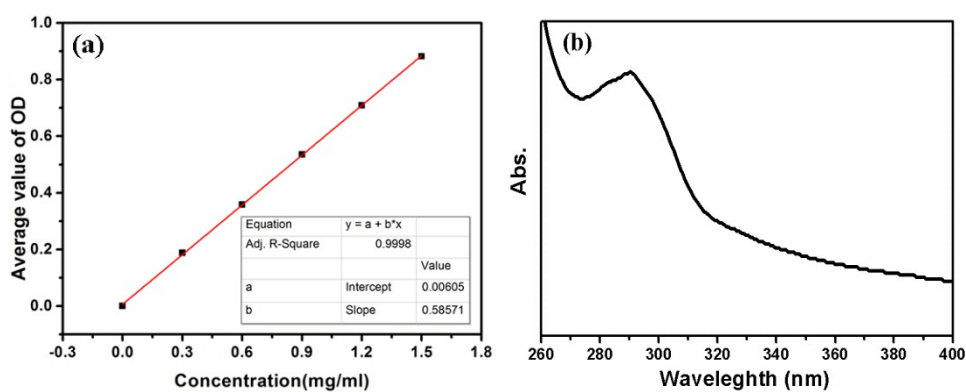

Fig. S2 (a) Standard curve of BSA solution; (b) UV-vis spectra of BSA desorption from MI-LPSPs

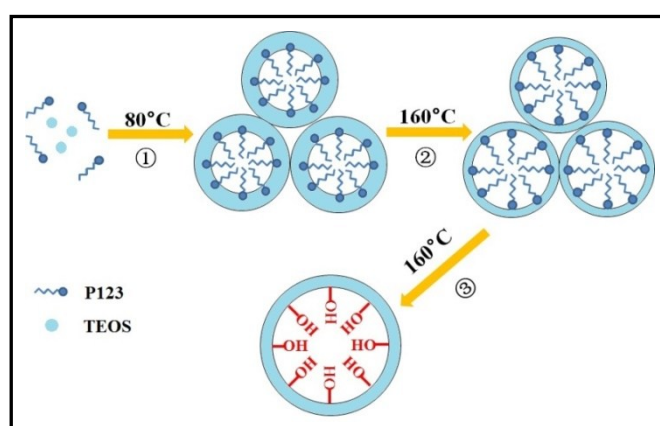

Fig. S3 The proposed mechanism for synthesis of LPSPs

① TEOS and P123 combine to form organic-inorganic composite in aqueous solutions with relatively low acid concentration at 80 °C; ② In the early stage of hydrothermal treatment at 160 °C, PEO shrinks into the hydrophobic region of micelles to expand the size of hydrophobic region; ③ With the increase of time of hydrothermal treatment at 160 °C, organic template is gradually removed because of weaker hydrogen bond

interaction. Simultaneously, mesoporous channel were merged to form larger mesopores, and abundant Si-OH groups are maintained.

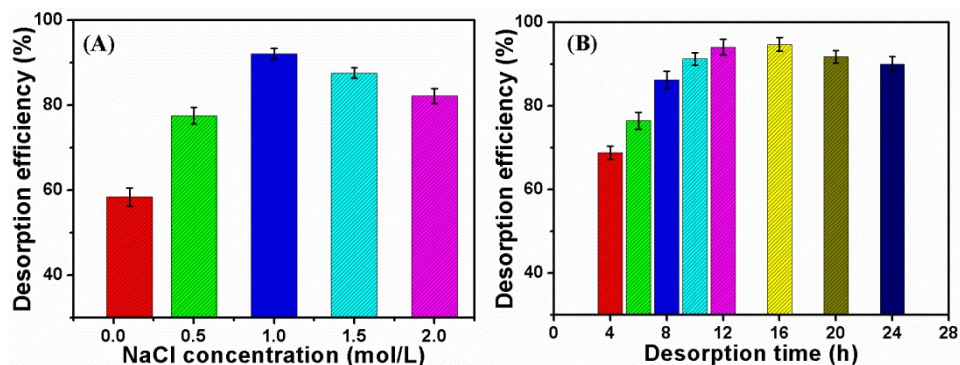

Fig. S4 The effects of (A) NaCl concentrations (desorption period: 10 h, solution volume: 20 mL, pH: 7.0) and (B) desorption period (NaCl concentration: 1.0 mol/L, solution volume: 20 mL, pH: 7.0) on the desorption of BSA from MI-LPSPs

Table. S1 Physi-chemical parameters of LPSPs, MI-LPSPs-BSA and MI-LPSPs

| Samples      | Specific surface area (m <sup>2</sup> /g) | Pore volume (cm <sup>3</sup> /g) | Average pore diameter (nm) |
|--------------|-------------------------------------------|----------------------------------|----------------------------|
| LPSPs        | 472.8                                     | 2.35                             | 23.8                       |
| MI-LPSPs-BSA | 303.2                                     | 0.64                             | 5.6                        |
| MI-LPSPs     | 337.5                                     | 0.81                             | 8.8                        |

Table S2 Kinetic parameters for BSA adsorption by MI-LPSPs and NI-LPSPs

| Adsorbent | $q_{exp}$ (mg/g) | Pseudo-first order         |              |       | Pseudo-second order   |              |       |
|-----------|------------------|----------------------------|--------------|-------|-----------------------|--------------|-------|
|           |                  | $k_1$ (min <sup>-1</sup> ) | $q_e$ (mg/g) | $R^2$ | $k_2$ (g/(mgmin))     | $q_e$ (mg/g) | $R^2$ |
| MI-LPSPs  | 153.62           | $1.47 \times 10^2$         | 144.09       | 0.996 | $0.35 \times 10^{-3}$ | 149.53       | 0.998 |
| NI-LPSPs  | 50.43            | $0.51 \times 10^2$         | 246.31       | 0.988 | $0.38 \times 10^{-3}$ | 52.82        | 0.979 |

Table S3 The Langmuir and Freundlich isotherm parameters obtained by the adsorption of BSA on MI-LPSPs and NI-LPSPs

| Adsorbent | $q_{exp}$ (mg/g) | Langmuir     |              |       | Freundlich |      |       |
|-----------|------------------|--------------|--------------|-------|------------|------|-------|
|           |                  | $q_m$ (mg/g) | $K_L$ (L/mg) | $R^2$ | $K_F$      | $n$  | $R^2$ |
| MI-LPSPs  | 165.82           | 167.50       | 86.65        | 0.999 | 107.8      | 1.68 | 0.701 |
| NI-LPSPs  | 62.68            | 63.09        | 11.24        | 0.998 | 290.3      | 2.17 | 0.857 |
